# Supplementary material for: BrLAS, a GRAS Transcription Factor From Brassica rapa, Is Involved in Drought Stress Tolerance in Transgenic Arabidopsis
Source: Front Plant Sci. 2018 Dec 6;9:1792. doi: 10.3389/fpls.2018.01792 (PMC6291521; doi:10.3389/fpls.2018.01792)
Supplement: Supplementary file 1 [file Data_Sheet_1.pdf]

## Supplementary Material

### ***BrLAS*, a *GRAS* Transcription Factor from *Brassica rapa*, is Involved in Drought Stress Tolerance in Transgenic *Arabidopsis***

Pan Li, Bin Zhang, Tongbing Su, Peirong Li, Xiaoyun Xin, Weihong Wang, Xiuyun Zhao; Yangjun Yu, Deshuang Zhang, Shuancang Yu<sup>\*</sup>, and Fenglan Zhang<sup>\*</sup>

**\*Correspondence:** Shuancang Yu, yushuancang@nercv.org

Fenglan Zhang, zhangfenglan@nercv.org

**Supplementary Table S1. Primers used in this study.**

**Supplementary Table S2. Comparisons of the phenotypes of wild-type and *BrLAS*-overexpressing plants.**

**Supplementary Figure S1 The expression profile of *BrLAS* under normal conditions in *B.rapa*.**

**Supplementary Figure S2. Lateral root growth in 35S: *BrLAS* transgenic compared to wild-type (Col-0) plants.**

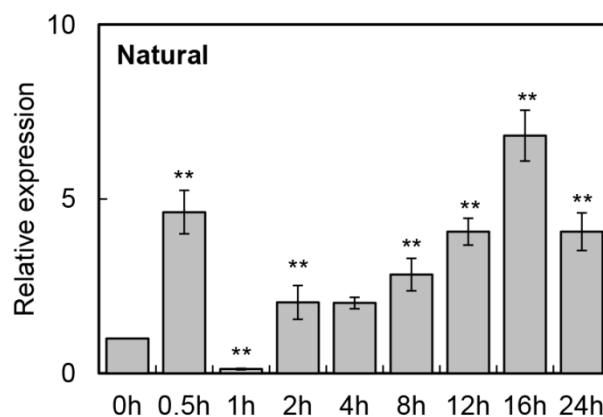

**Supplementary Figure S1 The expression profile of *BrLAS* under normal conditions in *B.rapa*.** The expression patterns of *BrLAS* under normal conditions using solution without ABA, NaCl, PEG, or H<sub>2</sub>O<sub>2</sub>. Expression data of the 0h sample was normalized to 1

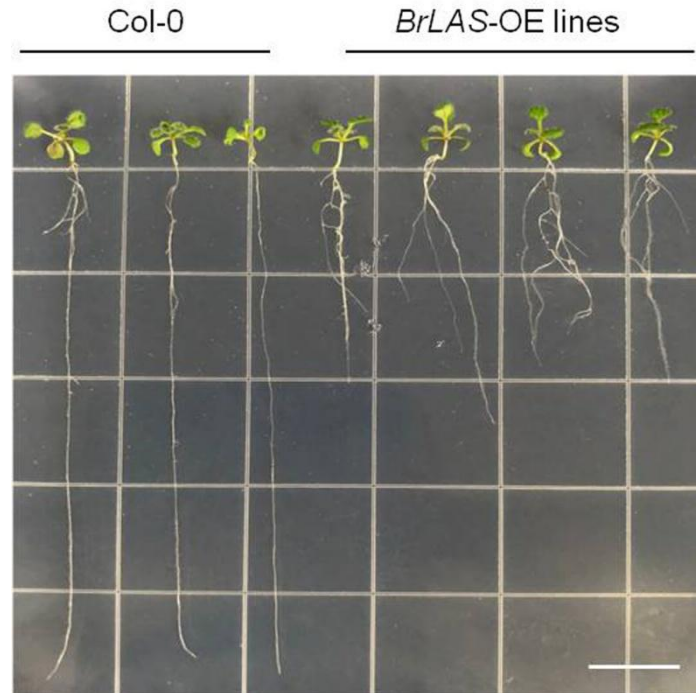

**Supplementary Figure S2 Lateral root growth in 35S: *BrLAS* transgenic compared to wild-type (Col-0) plants.** A relatively larger number of lateral roots were observed in the transgenic compared to wild-type plants.
